# Supplementary material for: Nature vs. Nurture: Evidence for Social Learning of Conflict Behaviour in Grizzly Bears
Source: PLoS One. 2016 Nov 16;11(11):e0165425. doi: 10.1371/journal.pone.0165425 (PMC5112868; doi:10.1371/journal.pone.0165425)
Supplement: S1 Data File — (XLSX) [file pone.0165425.s001.xlsx]

## Sheet: S1 Data File
	Mom Conflict	Mom No Conflict	Row Total
Offspring Conflict	5	18	23
Offspring NO conflict	3	50	53
Column Total	8	68	76
	Father Conflict	Father No Conflict	Row Total
Offspring Conflict	8	26	34
Offspring NO conflict	19	66	85
Column Total	27	92	119
Male offspring	Mom Conflict	Mom No Conflict	Row Total
Offspring Conflict	4	11	15
Offspring NO conflict	3	30	33
Column Total	7	41	48
Male offspring	Father Conflict	Father No Conflict	Row Total
Offspring Conflict	4	14	18
Offspring NO conflict	7	30	37
Column Total	11	44	55
Female offspring	Mom Conflict	Mom No Conflict	Row Total
Offspring Conflict	1	7	8
Offspring NO conflict	0	20	20
Column Total	1	27	28
Female offspring	Father Conflict	Father No Conflict	Row Total
Offspring Conflict	4	12	16
Offspring NO conflict	12	36	48
Column Total	16	48	64
